# Supplementary figures and images for: HyDesign: a tool for sizing optimization for grid-connected hybrid power plants including wind, solar photovoltaic, and Li-ion batteries
Source: Copernicus journal article supplement (doi:10.5194/wes-2023-83), 2023-07-18

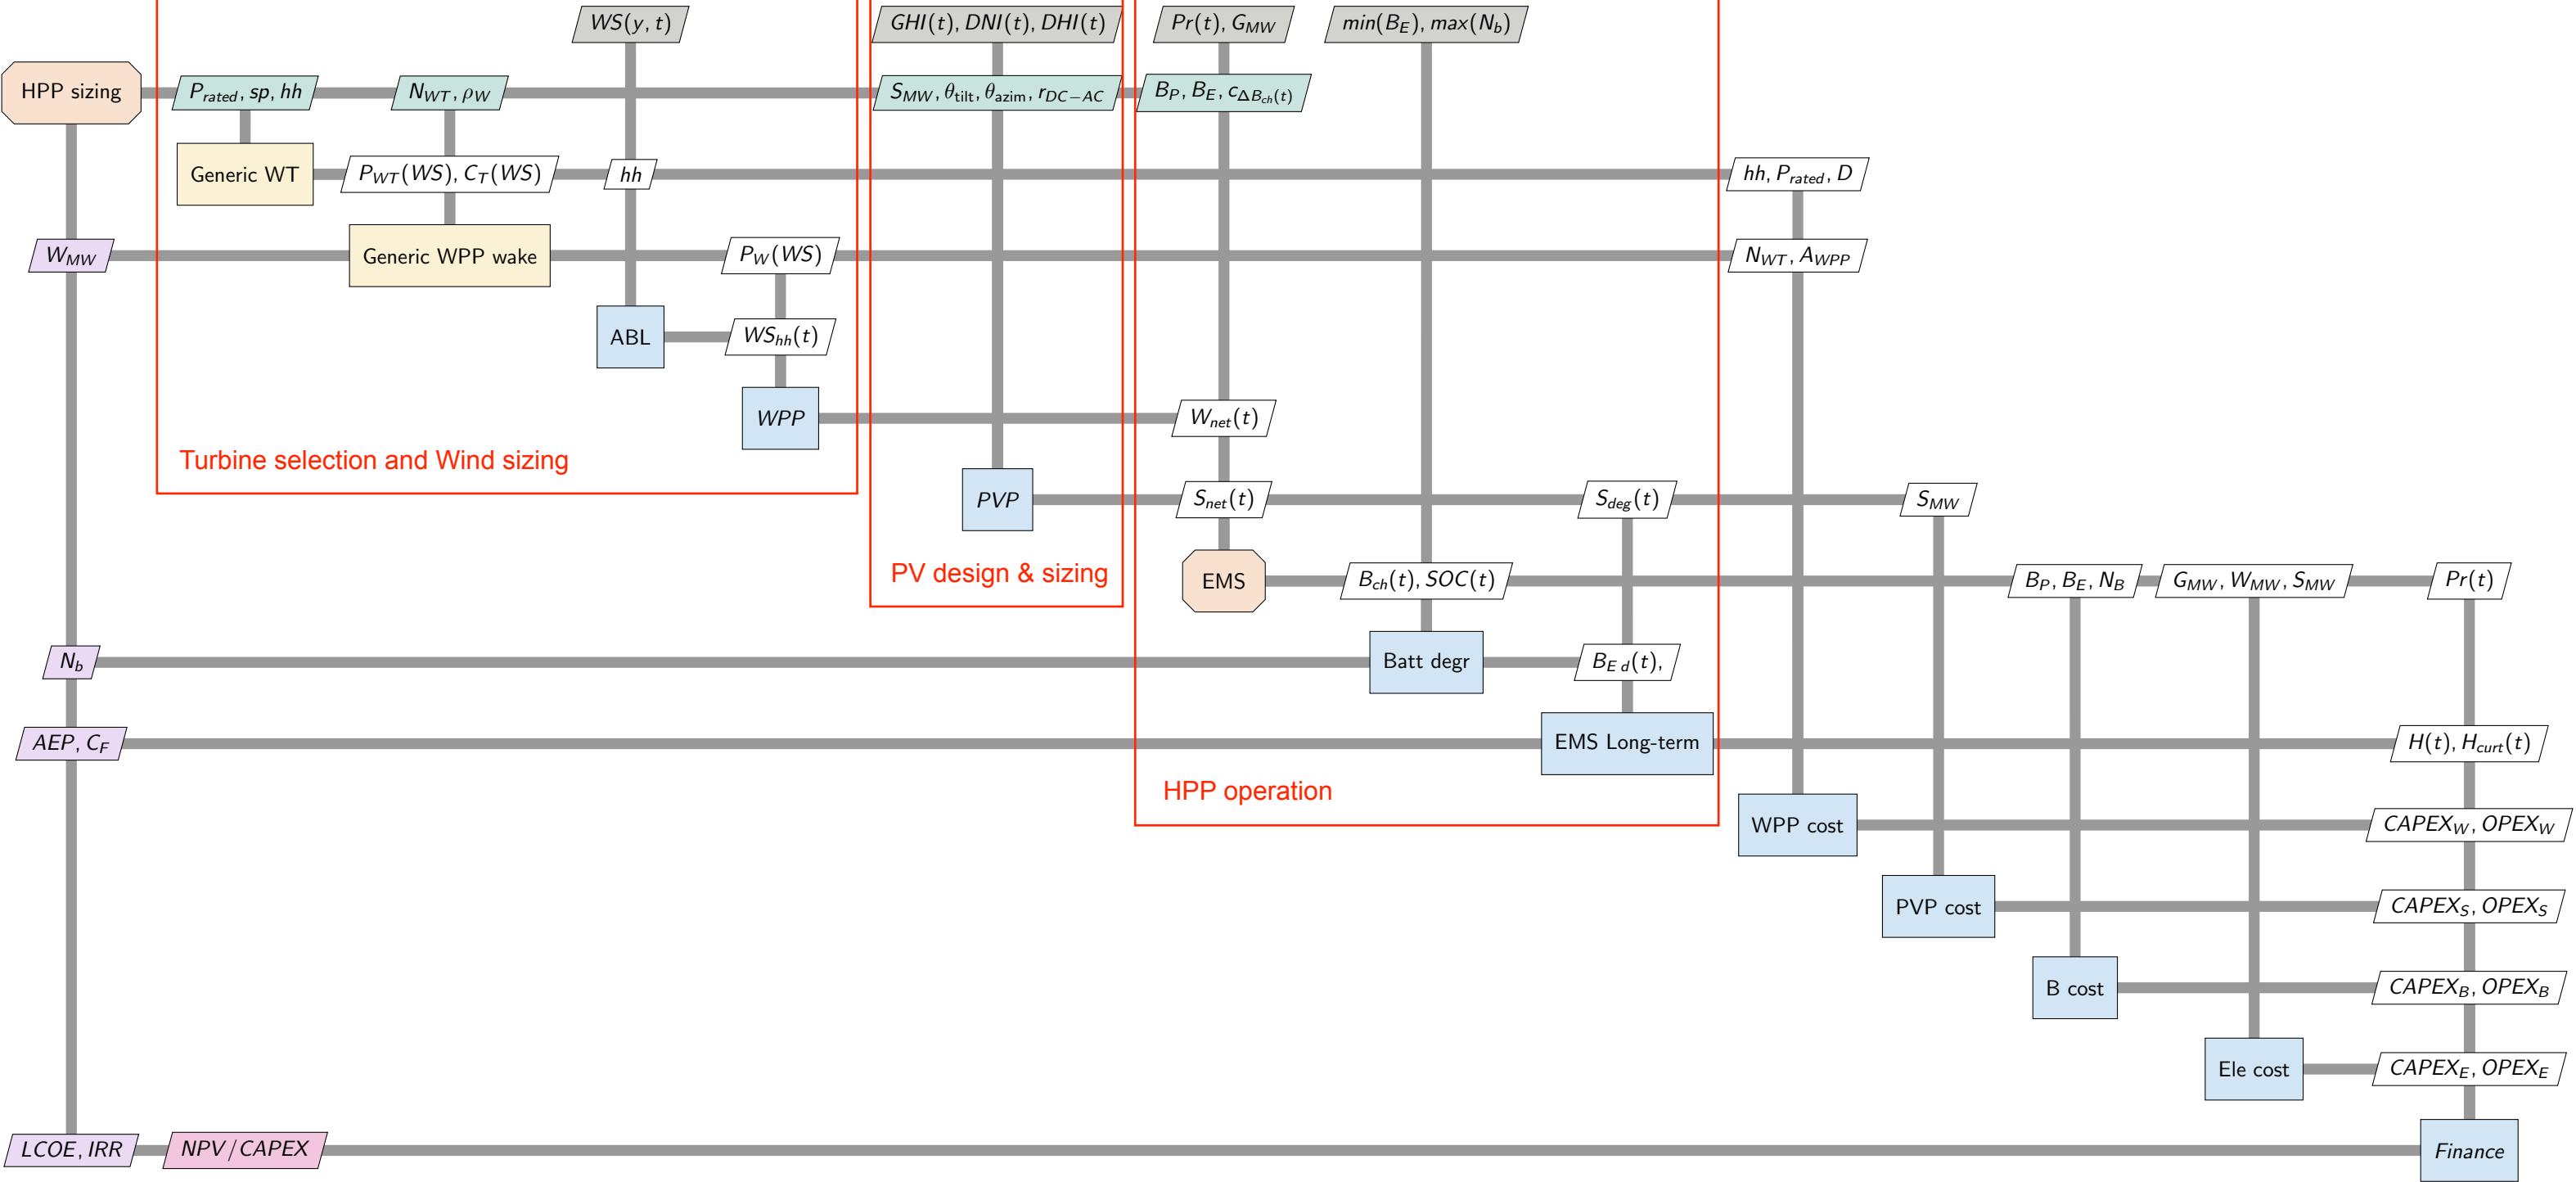

Optimization  
 Model  
 Surrogate  
 Input variable  
 Design variable  
 Objective  
 Output variable

Supplement: Supplementary file 1 [file wes-2023-83-supplement.pdf]
